1 **Bipartite influence of abscisic acid on xylem differentiation trajectories is**  
2 **dependent on distinct VND transcription factors in Arabidopsis**

3

4 Prashanth Ramachandran<sup>1</sup>, Frauke Augstein<sup>1</sup>, Shamik Mazumdar<sup>2</sup>, Thanh Van  
5 Nguyen<sup>1</sup>, Elena A. Minina<sup>3</sup>, Charles W. Melnyk<sup>2</sup> and Annelie Carlsbecker<sup>1,\*</sup>

6 <sup>1</sup>Department of Organismal Biology, Physiological Botany, Linnean Centre for Plant  
7 Biology, Uppsala University, Ullsv. 24E, SE-756 51, Uppsala, Sweden.

8 <sup>2</sup>Department of Plant Biology, Linnean Center for Plant Biology, Swedish University  
9 of Agricultural Sciences, Ullsv. 24E, SE-756 51, Uppsala, Sweden

10 <sup>3</sup>Department of Molecular Sciences, Linnean Center for Plant Biology, Swedish  
11 University of Agricultural Sciences, Ullsv. 24E, SE-756 51, Uppsala, Sweden

12 \* **Corresponding author:** Annelie Carlsbecker, e-mail:  
13 [annelie.carlsbecker@ebc.uu.se](mailto:annelie.carlsbecker@ebc.uu.se)

14 **Key words:** ABA, *Arabidopsis thaliana*, plasticity, VND, water deficiency, xylem  
15 differentiation

16

17 **Summary**

18 Plants display a remarkable ability to adjust their growth and development to  
19 changes in environmental conditions, such as reduction in water availability. This  
20 high degree of plasticity is apparent not only as altered root and shoot growth rates,  
21 but also as changes to tissue patterning and cell morphology [1,2]. We have  
22 previously shown that *Arabidopsis thaliana* root xylem displays plastic developmental  
23 responses to limited water availability, mediated by non-cell autonomous action of  
24 abscisic acid, ABA [2]. Here, we show through analyses of ABA response reporters  
25 and tissue specific suppression of ABA signalling that xylem cells act as primary  
26 signalling centres for mediation of changes to both xylem cell fate and differentiation  
27 rate revealing a cell autonomous control of xylem development by ABA.  
28 Transcriptomic changes in response to ABA showed that members of the  
29 VASCULAR RELATED NAC DOMAIN (VND) transcription factor family are rapidly  
30 activated. Molecular and genetic analyses revealed that the two aspects of xylem  
31 developmental changes, cell fate and differentiation rate, are dependent on distinct  
32 members of this transcription factor family. Thus, this study provides insights into  
33 how different aspects of developmental plasticity can be interlinked, yet genetically  
34 independent of each other. Moreover, similarities in phenotypic and molecular  
35 responses to ABA in diverse species indicate an evolutionary conservation of the  
36 ABA-xylem development regulatory network among eudicots. Hence, this study gives  
37 molecular insights on how environmental stress promotes anatomical plasticity to key  
38 plant traits with potential relevance for water use optimization and adaptation to  
39 drought conditions.

40

41

## 42 Results and Discussion

43

### 44 ABA affects both xylem cell fate and differentiation rate in Arabidopsis roots

45 We and others have previously shown that water limiting condition triggers the  
46 initiation of multiple protoxylem-like cells with spiral secondary cell walls (SCW) (Fig.  
47 1A, B, C, E, S1B; [2,3]). This effect is partly dependent on ABA signaling within the  
48 endodermal cell layer, surrounding the vascular stele, resulting in enhanced levels of  
49 microRNA165. This miRNA acts as a non-cell autonomous signal suppressing target  
50 HOMEODOMAIN-LEUCINE ZIPPER class III (HD-ZIP III) transcription factors within  
51 the stele, thus promoting protoxylem over metaxylem cell fate [4,5]. Interestingly, a  
52 recent study showed that in certain Arabidopsis ecotypes metaxylem form closer to  
53 the root tip, and this may lead to enhance hydraulic conductance and better survival  
54 under water limiting conditions in certain Arabidopsis ecotypes [6]. We, therefore,  
55 hypothesized that other ecotypes may achieve a similar phenotype by enhancing  
56 xylem differentiation rates, and that this could be a plastic developmental response to  
57 water limiting conditions. To assess this, we first analyzed the distance at which  
58 secondary cell wall (SCW) lignification was observed in the Columbia (Col-0) ecotype  
59 after treatment with 1 $\mu$ M ABA. We have previously shown that this treatment can be  
60 used as a proxy for water limiting conditions without the negative impact on root  
61 growth, and that may confound analysis of xylem differentiation rate (Fig.S1A; [2]). A  
62 48h ABA treatment caused protoxylem cells occupying the outer position (*px*  
63 position) of the xylem axis traversing the Arabidopsis root (Fig. 1A, B) to differentiate  
64 slightly closer to the root tip (*px* mock at 1264 $\pm$ 139 $\mu$ m (SD) vs. ABA at 1060 $\pm$ 240  
65  $\mu$ m), whereas the metaxylem cells next to these cells (*outer metaxylem*, *omx*,  
66 position), differentiated significantly closer to the root tip (*omx* mock 2950 $\pm$ 374 $\mu$ m vs  
67 ABA 1912 $\pm$ 393 $\mu$ m; Fig.1F, G). However, as previously described [2] the cells in the  
68 *omx* position frequently underwent a change in fate upon ABA treatment resulting in  
69 xylem vessels with reticulate or even protoxylem-like spiral SCW rather than the  
70 pitted morphology usually observed in Arabidopsis primary root metaxylem (Fig. 1C,  
71 E, S1B). Because protoxylem cells normally differentiate first and thereby closer to  
72 the root tip (hence 'proto'), the observed earlier differentiation in the *omx* position  
73 may be coupled to the change in fate. In contrast to the *omx*-cells, we found that the  
74 *inner metaxylem*, *imx*, cells never formed reticulate or spiral SCW upon 1 $\mu$ M ABA

75 treatment (Fig. 1C), suggesting that fate change did not occur in these cells.  
76 Therefore, we monitored the cells occupying the *imx* position that normally  
77 differentiate late and at a considerable distance from the tip (generally >7 mm from  
78 the tip in 5-day old seedlings). Despite the absence of any change in SCW  
79 morphology, a 48h treatment with 1 $\mu$ M ABA resulted in 94% of the roots displaying  
80 differentiated *imx* at 7 mm from the root tip (Fig.1H) compared to 0% in mock-treated  
81 plants, suggesting that ABA promotes metaxylem differentiation rate independent of  
82 its effect on xylem morphology or root growth. Furthermore, transferring back to  
83 mock conditions restored both normal xylem morphology and differentiation rate  
84 within 48h (Fig.S1C,D,E), corroborating the notion of considerable developmental  
85 plasticity in the formation of plant xylem.

86 The importance for canonical PYL/PYR receptor-PPC2 mediated ABA signaling in  
87 affecting xylem differentiation was evident by the ability for the dominant ABA  
88 *INSENSITIVE 1* mutant (*abi1-1*), in which ABA signaling is suppressed even in the  
89 presence of ABA [7,8], to strongly reduce the effects of ABA treatment on early *imx*  
90 differentiation (20% in *abi1-1* vs 94% in wildtype; Fig. 1D,I), and on xylem fate  
91 change in *omx* (Fig.S1F; [2]). However, while repression of ABA signaling specifically  
92 in the endodermis (using *pSCR::abi1-1*) could significantly suppress the *omx* fate  
93 change (Fig. S1G; [2]), it had less effect on the enhanced differentiation (65% vs  
94 100%; Fig. S1H), suggesting that ABA signaling in other cell types contribute to these  
95 dynamic xylem responses. To determine the cell-types in which ABA response  
96 occurs we used available synthetic ABA responsive reporters with tandem ABRE  
97 element repeats of two ABA responsive genes, *ABI1* and *RAB18*  
98 (*p6XABRE\_A:GFP<sub>er</sub>* and *p6XABRE\_R:GFP<sub>er</sub>*) [9]. Under mock conditions, both  
99 reporters revealed weak expression in the epidermal cells and the  
100 *p6XABRE\_A:GFP<sub>er</sub>* line also displayed weak expression in the endodermal, xylem  
101 pole pericycle and protoxylem precursor cells suggesting ABA signaling occurs in  
102 these tissues under non-stressed conditions (Fig. 1J, S1I). After 6-8h treatment with  
103 1 $\mu$ M ABA, the signal intensity of both reporters increased in these tissues, and, within  
104 the stele, an ABA response maximum was observed in the xylem precursor cells,  
105 especially in the *px* position (Fig.1J,S1I). Next, we simulated water stress by growing  
106 plants on media overlaid with 550g/l polyethylene glycol (PEG; Fig. S1J) which  
107 generated a negative water potential of -1.2 MPa and thus limited water availability.

108 Here, we observed a similar but stronger ABA response suggesting that exogenous  
109 ABA treatment could recapitulate the cell-specific ABA response observed during  
110 water deprivation.

111

## 112 **ABA signalling within the xylem activates VND transcription factors**

113 The ABA response profile prompted us to investigate the importance of ABA  
114 signaling in different tissue domains for xylem differentiation. We analyzed F1  
115 progeny of the *UAS:abi1-1* [10] line crossed with transactivation lines expressing in  
116 the xylem axis, *J1721*, procambium, *Q0990*, or ground tissue, *J0571*, upon ABA  
117 treatment (Fig.2A, Fig. S2A). We found that the *abi1-1* xylem driver line could  
118 efficiently suppress ABA's effects on both xylem differentiation rate and fate (Fig.  
119 2B,C, Fig. S2B). Neither the procambium nor the ground tissue *abi1-1* driver lines  
120 could suppress xylem differentiation rate, but consistent with our previous  
121 observations the ground tissue line could partially suppress the xylem fate changes  
122 (Fig. 2B,C; S2B;[2]). Furthermore, while the mock treated ground tissue line  
123 occasionally displayed discontinuous metaxylem [2], neither of the stele driver lines  
124 displayed altered xylem differentiation under mock conditions (Fig. S2B,C). These  
125 results suggest that basal ABA signaling in the stele is not critical for xylem formation  
126 *per se*, but that signaling within the xylem cells themselves is essential for plastic  
127 changes in both xylem differentiation rate and fate upon conditions causing elevated  
128 ABA levels.

129

130 Consistent with the observation that ABA signaling in xylem cells is important for their  
131 developmental trajectories, transcriptome analysis of 8h ABA-treated roots revealed  
132 differential expression of more than 200 genes that were previously assigned to a  
133 xylem expressed cluster in a single cell RNA sequencing study on roots [11] (Fig.  
134 S3ED, Table S1). Among genes responding to ABA we found down regulation of HD-  
135 ZIP III genes (*ATHB8* and *REV*), as expected from previous studies [2], but also  
136 upregulation of multiple xylem differentiation regulators along with cellulose and  
137 lignin-biosynthesis genes (Table S1). We identified the closely related *VND2*, *VND3*  
138 and *VND7* transcription factors [12–15] among upregulated xylem developmental  
139 regulators, suggesting that several VND-gene family members are ABA regulated. To  
140 test this observation further, we performed qRT-PCR after 2, 4 and 8h 1µM ABA

141 treatment in root tips for all VND factors along with a number of other xylem  
142 differentiation regulators (Fig.2D, S2D,E). We found that 2h of 1 $\mu$ M ABA treatment  
143 was sufficient to significantly upregulate *VND1*, *VND2*, *VND3*, *VND4*, and *VND7*,  
144 while longer treatment times induced also *VND5* whereas *VND6*, previously found to  
145 promote metaxylem differentiation [12], was not upregulated, even after treatment  
146 with higher concentrations of ABA (Fig.2D,S2F).

147

148 Analysis of transcriptional reporter lines revealed that *VND1*, *VND2* and *VND3*  
149 express in immature xylem cells within the meristem, with *VND1* expression  
150 restricted to *omx* cells, *VND2* to all metaxylem precursor cells (*omx* and *imx*), while  
151 *VND3* expression was observed in *px*, *omx* and *imx* cells (Fig.2E). *VND3* expression  
152 extended into the differentiation zone, while *VND1* and *VND2* were restricted to the  
153 meristem (Fig.2E,S2G). *VND7* expressed specifically in the protoxylem precursors  
154 within the meristem and continued beyond the meristem primarily within these cell  
155 lineages [5] (Fig.2E,S2G). Significantly enhanced levels but no change in expression  
156 pattern of *VND3::NLS-YFP* was detected after 1 $\mu$ M ABA treatment for 6-8h  
157 (Fig.S2H,I). Consistent with the notion that ABA signaling within the xylem axis is  
158 required for their elevated levels, the xylem J1721>>abi1-1 driver could suppress the  
159 activation of *VND1*, *VND2* and *VND3* by 1 $\mu$ M ABA (Fig. 2F). Taken together, these  
160 data show that VND gene expression rapidly and specifically increases within the  
161 xylem precursor cells upon increase in ABA levels.

162

### 163 **VNDs regulate plasticity in xylem fate and differentiation rate**

164 To test the requirement for VND transcription factors for the ABA-induced xylem  
165 developmental changes we analyzed *vnd* mutant xylem phenotypes after ABA  
166 treatment and after growth under water limiting conditions. Under mock conditions,  
167 *vnd1*, *vnd2*, *vnd3* and *vnd7* single and most double mutant combinations displayed a  
168 wildtype-like xylem pattern (Fig.S3A). However, the *vnd2vnd3* (*vnd2,3*) and  
169 *vnd1vnd2vnd3* (*vnd1,2,3*) mutants displayed discontinuous metaxylem strands (Fig.  
170 3A,B,D) and in *vnd1,2,3* the metaxylem strand in one of the *omx* and in the *imx*  
171 position frequently failed to differentiate entirely (Fig.3D). Upon ABA treatment  
172 *vnd2,3* and *vnd1,2,3*, and to some extent also *vnd2* and *vnd3* did not display early  
173 xylem differentiation in the *imx* position seen in ABA-treated wildtype plants  
174 (Fig.3A,C; Fig.S3B). Exposure of wildtype plants to water limiting conditions,

175 achieved by growth on PEG-overlaid media, resulted in early xylem differentiation in  
176 the *imx* position, but also reduced root growth, rendering it difficult to measure the  
177 extent of the early xylem formation. However, importantly, in *vnd1vnd3*, *vnd2,3* and  
178 *vnd1,2,3* mutants the early xylem phenotype was suppressed, although root growth  
179 was affected similarly as in wildtype (Fig. 3D,E, S3C,D). Hence, these VND factors  
180 are required to promote early xylem differentiation in the *imx* position, upon ABA  
181 signaling and under water limiting conditions.

182

183 Despite having a role in *imx* differentiation rate, *vnd2,3* and *vnd1,2,3* displayed  
184 protoxylem-like or reticulate xylem morphology in the *omx* position as well as early  
185 xylem differentiation in this position upon ABA treatment (Fig.3A,B S3F,G). Instead,  
186 we found a requirement for *VND7* in controlling the *omx* fate change because the  
187 shift to reticulate xylem and protoxylem in the *omx* position upon ABA treatment was  
188 partially suppressed in the *vnd7* mutant (Fig.3A, B). This is in line with the expansion  
189 in *VND7* expression into metaxylem cells upon high concentration of ABA, previously  
190 noted by Bloch et al [16]. The *vnd7* mutant, however, responded with early *omx* and  
191 *imx* differentiation similar to wildtype (Fig.3C, S3F,G). Hence, treating the *vnd7*  
192 mutant with ABA revealed a previously uncharacterized necessity for *VND7* in the  
193 change in xylem cell fate from metaxylem towards protoxylem-like cells. Furthermore,  
194 our results indicate that ABA's effect on xylem differentiation rate can be genetically  
195 separated from its effect on xylem cell fate change via the activation of distinct VND  
196 genes.

197

198 To further dissect the impact of these VNDs in xylem developmental plasticity upon  
199 ABA treatment we analyzed the transcriptomic effects in the *vnd1,2,3* and *vnd7*  
200 mutants (Table S1.). Confirming the importance of these factors for xylem  
201 differentiation, ABA's induction of xylem cell death regulators, *XCP1* and *XCP2*,  
202 secondary cell wall related genes such as *WAL*, *IRX5*, *IRX8*, *AtCTL2* were  
203 suppressed in *vnd1,2,3*. In total, 95 of the 223 ABA-induced xylem enriched genes,  
204 were dependent on the VNDs (Fig. S3E). We also found SCW related genes, such  
205 as *IRX12*, *IRX15*, *TBL3*, *CESA7* and *CESA8*, as well as *MYB46* and *ANAC075* [17–  
206 19], that were upregulated upon ABA treatment in wildtype and *vnd1,2,3*, suggesting  
207 the presence of other upstream activators of these factors in response to ABA. Since  
208 *MYB46* is down stream of *VND7* [20] and *VND1*, *VND2*, *VND3* and *ANAC075* are

209 upstream regulators of *VND7* [13], we reasoned that all four VNDs might act  
210 redundantly with each other, in particular in *omx* differentiation, and we therefore  
211 generated a *vnd1vnd2vnd3vnd7* mutant. In this mutant, the fate change upon ABA  
212 treatment in the *omx* positions was prevented, as well as the premature  
213 differentiation in the *imx* position (Fig. 3G,S3H), showing the additivity of the two  
214 phenotypes. However, although the cells in the *omx* position maintained a metaxylem  
215 morphology with pitted cell walls, they could still respond to ABA with faster  
216 differentiation similar to wildtype (Fig. 3G, H). Hence, factors other than VND1,  
217 VND2, VND3 and VND7 contribute to the early differentiation in this position or they  
218 act redundantly with the VNDs in controlling xylem differentiation rate.

219

### 220 **ABA induces ectopic lignification in cotyledons**

221 Analysis of the genes responding to ABA identified a considerable overlap with  
222 genes induced upon tracheary element trans-differentiation in Arabidopsis cell  
223 suspension cultures [12]. We therefore asked if ABA could induce trans-  
224 differentiation of mesophyll to xylem cells in cotyledons, as previously seen to occur  
225 upon treatment with a cocktail consisting of bikinin, an inhibitor of GSK3 kinases  
226 involved in brassinosteroid signaling, along with auxin and cytokinin [21]. We  
227 substituted bikinin for ABA and, strikingly, we found ectopic lignification occurring in  
228 cells encompassing 50-70% of the cotyledon area (excluding the normal venation)  
229 (Fig.4A, B, S4B,C), an effect suppressed in the *abi1-1* mutant to 30% (Fig. 4B).  
230 However, these ectopically lignified cells did not form properly patterned SCW, as  
231 observed upon bikinin treatment [21], suggesting that ABA treatment could not  
232 induce the full differentiation program of tracheary element cells during the trans-  
233 differentiation process. Nonetheless, the formation of ectopic lignification was  
234 suppressed in the *vnd1,2,3* and *vnd7* mutants (Fig. 4A,B), suggesting that the ectopic  
235 formation of ABA induced lignified cell walls is at least partly mediated by the VND1,  
236 2, 3, and 7 transcription factors.

237

### 238 **ABA promotes xylem differentiation in several eudicot species**

239 To understand the conservation in plant xylem responses upon stress, we analyzed  
240 the root xylem upon ABA treatment in five different eudicot species (Fig. 4C-E, S4D-  
241 F). We found that *Brassica napus* and *Brassica rapa* (Brassicales, Rosidae),  
242 *Nicotiana benthamiana* and *Solanum lycopersicum* (Solanales, Asteridae) and



243 *Phtheirospermum japonicum* (Lamiales, Asteridae) all displayed early xylem  
244 differentiation and a higher number of xylem strands compared to mock condition,  
245 similar to what we had observed in *Arabidopsis* (Fig.4C-E,S4D-F). Furthermore, we  
246 observed a significant upregulation of putative tomato *VND1* (*Solyco02g083450*),  
247 *VND4* (*Solyco08g079120*) and *VND6* (*Solyco06g065410*) homologs after 6h of 1 $\mu$ M  
248 ABA treatment (Fig.S4G). These results suggest a conservation in molecular and  
249 phenotypic responses to ABA among eudicots.

250

251 Taken together, here we provide insights into the molecular regulation underlying the  
252 observed xylem developmental plasticity in *Arabidopsis*, by showing that ABA  
253 signaling triggers alterations in xylem cell developmental trajectories, both affecting  
254 their fate and their rate of differentiation, through the activation of distinct  
255 transcriptional regulators belonging to the same gene family, the VND genes (Fig.  
256 4F). Several pieces of evidence indicate that ABA signaling acts within the xylem  
257 cells to trigger the activation of these factors to accomplish these feats. However,  
258 ABA also acts non-cell autonomously via the activation of miR165 in the endodermis,  
259 reducing levels of HD-ZIP III transcription factors in the stele (Fig. 4F) [2,16].  
260 Intriguingly, both pathways appear important for the determination of xylem cell fate.  
261 While studies of gene regulatory networks have uncovered a complex interplay of  
262 VND and HD-ZIP III transcription factors [19], it remains to be seen how these factors  
263 temporally may interplay within the pluripotent xylem precursor cells to determine  
264 xylem cell fate, under normal growth conditions and during stress.

265

266 The two distinct phenotypic changes observed under ABA treatment and water  
267 limiting conditions may contribute two distinct advantages to the plant. A change  
268 towards more protoxylem-like cells may provide improved resistance to embolism  
269 that may form and affect water transport during conditions of reduced water  
270 availability [22]. Early formation of metaxylem, on the other hand, has been shown to  
271 enhance hydraulic conductance and increase drought resistance [6]. A subset of  
272 *Arabidopsis* accessions constantly displays early metaxylem development, however,  
273 this is associated with enhanced pathogen sensitivity, likely explaining why other  
274 accessions instead display this feature as a plastic trait in response to ABA-mediated  
275 stresses. Furthermore, a recent study identified a maize mutant defective in a VND-  
276 homologue that displayed symptoms of water stress under normal conditions due to

277 defective protoxylem cells in adult plants [23]. This suggests that VND transcription  
278 factor-dependent xylem cell acclimation to stress is a trait whose evolution preceded  
279 the divergence of monocots and eudicots, and thus unite most angiosperms. The  
280 ABA-VND regulation may thus be a potentially universal molecular toolkit for xylem  
281 cell developmental adjustments with utility for breeding of drought resilient crop  
282 plants.

283

## 284 **Acknowledgements**

285 We thank J. R. Dinneny, Stanford University, (ABA signaling reporter lines and *abi1-1*  
286 driver lines), T. Demura, NAIST, (VND mutant and reporter lines), M. Englund for  
287 technical assistance, and Nottingham Arabidopsis Stock Centre for seeds. This study  
288 was supported by funding from Nilsson Ehle Foundation, Lars Hiertas Minne, Lundell  
289 PO scholarship (to P.R.), a Wallenberg Academy Fellowship (KAW2016.0274 to  
290 C.W.M.), Vetenskapsrådet (to C.W.M and S.M.), and FORMAS (2017-00857 to  
291 A.C.).

292

## 293 **Author contributions**

294 Conceptualization, P.R., A.C. and F.A.; Investigation, P.R., F.A., S.M. and V.N.;  
295 Writing – Original Draft, P.R.; Writing – Review & Editing, P.R., A.C., C.W.M. and  
296 F.A.; Funding acquisition, P.R., A.C. and C.W.M.; Supervision, A.C., E.A.M. and  
297 C.W.M.

298

## 299 **Declaration of interests**

300 The authors declare no competing interests.

301

## 302 **Figure legends**

303 **Figure 1: ABA affects both xylem differentiation fate and rate in Arabidopsis**  
304 **roots**

305 **(A)** Cartoon of a cross section of the Arabidopsis root showing different cell types  
306 highlighting the different positions in the xylem axis, *px*, *omx* and *imx*. **(B-D)**  
307 Differential Interference Contrast (DIC) images of the xylem pattern at 7mm from the  
308 root tip after ABA treatment in WT (B, C) and *abi1-1C* (D). **(E)** Temporal analysis of  
309 xylem morphology changes in WT roots after 1µM ABA treatment for 4h, 6h, 8h, 24h  
310 and 48h. For the 4h, 6h and 8h ABA treatments, the total treatment time before root

311 xylem analysis was 24h. **(F)** Mock and ABA treated WT roots double stained with  
312 basic fuchsin (magenta) and calcofluor white (blue). Pink, yellow and blue-green text  
313 with white arrows indicate the first occurrence of a fuchsin stained xylem vessel in  
314 the *px*, *omx* and *imx* positions respectively. Under mock conditions, differentiated  
315 xylem in the *imx* position was detected at a distance > 7mm from the root tip, and not  
316 included within the imaged region of the root. **(G)** Quantification of distances from the  
317 root tip to the presence of first lignified vessel in *px* (left) and *omx* (right) positions. In  
318 the *px* position, spiral walled xylem vessels were present under both mock and ABA  
319 treatments, in *omx* position mock treated roots had pitted SCW while ABA treated  
320 roots had either pitted/reticulate/spiral SCW. The difference in morphology of vessels  
321 in *omx* position was not considered for the quantification of distances. Black filled  
322 dots represent measurements from individual roots. **(H)** Quantification of frequency of  
323 roots showing presence/absence of a lignified xylem vessel at the *imx* position in the  
324 lower 7mm of the root from the root tip, after 1 $\mu$ M ABA treatment. The treatment  
325 times are as in (E). **(I)**. Frequency of early *imx* differentiation measured as in (H) in  
326 WT and *abi1-1C* after 48h 1 $\mu$ M ABA treatment. **(J)**. Confocal micrographs showing  
327 the ABA response domains in the root apical meristem visualized using  
328 *6xABRE\_A:erGFP* after mock or 1 $\mu$ M ABA treatments. Radial optical sections were  
329 taken at 20 $\mu$ m and 60 $\mu$ m shootward of the quiescent center (QC). Magenta:  
330 Propidium iodide, Green: GFP and white arrow heads: xylem axis. RX, reticulate  
331 xylem; PX, protoxylem; *px*, protoxylem position; *omx*, outer metaxylem position; *imx*,  
332 inner metaxylem position. Scale bars: 50 $\mu$ m in B and D, 1mm in F. Statistics: \* in E,  
333 H and I represent P<0.05, Fisher's Exact Test. In G, *a,b,c* represent groups with  
334 significant differences, one way ANOVA with Tukey's post-hoc testing (P<0.05).  
335 Numbers at the bottom of the bars in E, G, H and I represent the number of roots  
336 analyzed.

337

## 338 **Figure 2: ABA signalling within the xylem activates VND transcription factors**

339 **(A)** Radial optical sections representing the activity domains of the J0571, Q0990  
340 and J1721 GAL4-enhancer trap lines imaged in F1 individuals from crosses with  
341 *UAS:abi1-1*. Arrowheads mark the xylem axis. **(B)** DIC images of the xylem pattern in  
342 48h 1 $\mu$ M ABA and mock treated *abi1-1* transactivation lines. **(C)** Quantification of  
343 early xylem differentiation in *imx* after mock and 1 $\mu$ M ABA treatment in different *abi1-*  
344 *1* transactivation lines. **(D)** Relative transcript levels of xylem development genes in

345 1mm WT root tips after 2h of 1µM ABA treatment using qRT-PCR. **(E)** Confocal  
346 images showing the transcription domains of *VND1*, *VND2*, *VND3* and *VND7* in the  
347 longitudinal and radial planes. **(F)**. Relative transcript levels of *VND1*, *VND2*, *VND3*  
348 and *VND7* after 8h ABA treatment in whole roots of F1 seedlings from cross between  
349 *UAS:abi1-1* and indicated GAL4 enhancer trap line quantified using qRT-PCR.  
350 *omx*, outer metaxylem position; *imx*, inner metaxylem position. Scale bars: 50µm in  
351 A, B, and E. Statistics: \* in C, represent P<0.05, Fisher's Exact test; \* in D represent  
352 P<0.05, two tailed Student's t-test. In F, *a,b,c* represent groups with significant  
353 differences, one way ANOVA with Tukey's post-hoc testing (P<0.05). Numbers at the  
354 bottom of the bars in C represent the number of individuals analyzed. In D and F, all  
355 values are normalized to the average of respective mock treated samples.

356

### 357 **Figure 3: VNDs regulate plasticity of xylem fate and differentiation rate**

358 **(A)**. Representative DIC images of mock and ABA treated wildtype (WT), *vnd2 vnd3*  
359 (*vnd2,3*) and *vnd7* root xylem taken at 7mm from the root tip. **(B-C)** Quantification of  
360 xylem morphology (B) and differentiation at 7 mm in *inner metaxylem position (imx)*  
361 (C) changes in *vnd2,3*, *vnd1 vnd2 vnd3 (vnd1,2,3)* and *vnd7* mutants. **(D)**  
362 Representative DIC images of mock and polyethylene glycol (PEG) treated WT,  
363 *vnd1,2,3* and *vnd7* root xylem. **(E)** Quantification of distances at which the first signs  
364 of differentiated *imx* was detected in WT, *vnd1,2,3* and *vnd7* roots subjected to mock  
365 or PEG treatments. **(F)** Heatmap showing RNA sequencing results displaying the  
366 response of a subset of xylem related genes upon ABA and in WT, *vnd1,2,3* and  
367 *vnd7* mutants. **(G)** DIC images showing xylem pattern in WT, *vnd2,3,7* and *vnd1*  
368 *vnd2 vnd3 vnd7 (vnd1,2,3,7)* mutants after 1µM ABA treatment. **(H)** Quantification of  
369 distances from the root tip to the first sign of lignified xylem in *omx* position for WT,  
370 *vnd2 vnd3 vnd7 (vnd2,3,7)* and *vnd1,2,3,7*. Scale bars are 50µm in A, D and G.  
371 Statistics: \* in B, C, E represent P<0.05, Fisher's Exact test; \* in F represents  
372 P<sub>adj</sub><0.05; in H, *a,b,c* represent groups with significant differences, one way ANOVA  
373 with Tukey's post-hoc testing (P<0.05). Numbers at the bottom of the bars in B, C, E  
374 and H represent the number of roots analyzed.

375

376

377 **Figure 4: ABA induces ectopic lignification in Arabidopsis cotyledons and**  
378 **promotes xylem differentiation in several eudicot species.**

379 **(A)** Fluorescent micrographs showing the formation of ectopic lignification in wild type  
380 (WT), *abi1-1C*, *vnd1 vnd2 vnd3 (vnd1,2,3)* and *vnd7* cotyledons after *in vitro* culture  
381 in auxin-cytokinin containing media with or without ABA. Ectopic lignification is  
382 visualized using lignin autofluorescence, and appear as dark spots on the  
383 cotyledons. **(B)** Quantification of ectopic lignification area in *in vitro* cultured WT,  
384 *abi1-1C*, *vnd1,2,3* and *vnd7* cotyledons. **(C-E)** Quantification of total number of  
385 lignified xylem vessels at specific distances from the root tip in *Brassica napus* (C),  
386 *Phtheirospermum japonicum* (D) and *Solanum lycopersicum (Money Maker)* (E) after  
387 mock and 1 $\mu$ M ABA treatment accompanied by representative images. **(F)** Model  
388 showing genetic components regulated cell autonomously by ABA to mediate two  
389 different phenotypic effects. The ABA signaling in the stele activates *VND2*, *VND3*  
390 and *VND7*. While *VND2* and *VND3* are mainly involved in ABA mediated  
391 enhancement of xylem differentiation rate, *VND7* mediates the switch in xylem  
392 morphology from pitted to a spiral or reticulate form. In the endodermis, ABA  
393 signaling activates a mobile miRNA, miR165 which results in a downregulation of  
394 stele expressed HD-ZIP III transcription factors to alter xylem fate [2,16].  
395 Scale bars are 1mm in A. Statistics: \* in C, D represent  $P < 0.05$ , Fisher's Exact test.  
396 In B, black dots represent individual measurements. Numbers at the bottom of the  
397 bars in B-E represent the number of individuals analyzed.

398

### 399 **Supplementary material**

400

### 401 **Figure S1: ABA affects both xylem differentiation fate and rate in Arabidopsis** 402 **roots**

403 **(A)** Quantification of root lengths in mock and ABA treated WT roots. **(B)**  
404 Representative DIC images of xylem morphological changes in 1 $\mu$ M ABA treated WT  
405 roots quantified in Figure 1E. **(C-D)** Quantification of xylem morphology (C) and *imx*  
406 differentiation rate (D) changes in ABA treated roots after transfer and growth for two  
407 days in mock, M, or ABA, A conditions and further transfer for growth for another two  
408 days under mock or ABA conditions. **(E)** Representative DIC images showing the  
409 xylem pattern after transfer of ABA treated roots to ABA or mock plates. **(F)**  
410 Quantification of xylem morphology changes in WT and *abi1-1 C* after 48h 1 $\mu$ M ABA  
411 treatment. **(G-H)** Quantification of xylem morphology (G) and *imx* differentiation rate  
412 (H) changes in *pSCR:abi1-1* lines after 48h 1 $\mu$ M ABA treatment. **(I-J)** Confocal

413 micrograph showing ABA response domain after ABA treatment visualized using  
414 *6xABRE\_R:erGFP* reporter (I) and after PEG treatment in *6XABRE\_A:erGFP* (J).  
415 Radial optical sections were taken at 20 and 60µm from the QC in I and J. Magenta:  
416 Propidium iodide, Green: GFP and white arrow heads: xylem axis. RX, reticulate  
417 xylem; PX, protoxylem; *px*, protoxylem position; *omx*, outer metaxylem position; *imx*,  
418 inner metaxylem position. in C, F and G. Scale bars: 50µm in B, E, I and J.  
419 Statistics: \* in C, D, F, G represent P<0.05, Fisher's Exact test. Numbers at the  
420 bottom of the bars in C, D, F, G and H represent the number of individuals analyzed.  
421

422 **Figure S2: ABA signalling within the xylem activates VND transcription factors**

423 **(A)** Activity domains of different enhancer trap lines used for transactivation of *abi1-1*  
424 under mock or ABA treatment. **(B)** Quantification of xylem morphology changes  
425 observed in *abi1-1* transactivation lines. Numbers at the bottom of the bars in B  
426 represent the number of individuals analyzed. **(C)** DIC images showing xylem breaks  
427 observed in *J0571>>abi1-1* lines. **(D-F)** Expression of xylem development genes as  
428 determined by qRT-PCR after 4h (D) and 8h (E) 1µM ABA treatment in 1mm root tips  
429 (D,E) and 50µM ABA treatment for 4h in whole roots (F). **(G)** Confocal images  
430 showing transcription domains of *VND3* and *VND7* within and above the  
431 meristematic zone. **(H)** Confocal images showing the activation of *pVND3::YFP-NLS*  
432 reporter after 1µM ABA treatment for 6-8h. **(I)** Quantification of YFP nuclear intensity  
433 in mock and ABA treated *pVND3::YFP-NLS*. Scale bars: 50µm in A, C, H and I.  
434 Statistics: \* in B, represent P<0.05, Fisher's Exact test; \* in D-F and I represent  
435 P<0.05, two tailed Student's t-test. In D-F, all values are normalized to the average of  
436 mock treated samples. Black dots in D-F represent biological replicates and grey  
437 dots represents each quantified nucleus in I.

438

439 **Figure S3: VNDs regulate plasticity of xylem fate and differentiation rate**

440 **(A-B).** Quantification of xylem morphology (A) and differentiation in inner metaxylem  
441 position (*imx*) at 7 mm from the root tip (B) after mock and 1µM ABA treatment (48h)  
442 in wild type (WT), single and double *vnd* mutants. **(C)** Quantification of xylem  
443 differentiation observed after polyethylene glycol (PEG) treatment in WT, *vnd1 vnd3*  
444 (*vnd1,3*) and *vnd2 vnd3* (*vnd2,3*) mutants. Plants were categorized depending on the  
445 distances at which the first lignified *imx* xylem vessel was observed. **(D)**  
446 Quantification of root lengths in *vnd1,3*, *vnd2,3*, *vnd7* and (*vnd1 vnd2 vnd3*) *vnd1,2,3*

447 mutants after PEG treatment. **(E)** Venn diagram illustrating the VND dependence of  
448 several ABA regulated xylem enriched genes [11]. Genes were considered to be  
449 VND dependent if they were significantly differentially expressed in WT upon ABA  
450 treatment but not in *vnd1,2,3* or *vnd7* mutants. **(F)** Quantification of distance from  
451 root tip to a lignified xylem vessel in the outer metaxylem position (*omx*) in WT,  
452 *vnd2,3*, *vnd1,2,3* and *vnd7* mutants. **(G)** Quantification of distance from root tip to a  
453 lignified xylem vessel in *imx* in WT, *vnd1,3*, *vnd2,3* and *vnd7* mutants. **(H)**  
454 Quantification of xylem morphology changes in *vnd2 vnd3 vnd7* (*vnd2,3,7*) and *vnd1*  
455 *vnd2 vnd3 vnd7* (*vnd1,2,3,7*) mutants. Statistics: \* in A, B, C represent  $P < 0.05$ ,  
456 Fisher's Exact test. In D and F-G, *a,b,c,d* represent groups with significant  
457 differences, one-way ANOVA with Tukey's post-hoc testing ( $P < 0.05$ ). Black dots in D,  
458 F-G represent biological replicates. Numbers at the bottom of the bars in A-D and F-  
459 H represent the number of roots analyzed.

460

461 **Figure S4: ABA induces ectopic lignification in Arabidopsis cotyledons and**  
462 **promotes xylem differentiation in several eudicot species.**

463 **(A)** Venn diagram of differentially expressed genes (DEG) upon ABA treatment and  
464 upon trans-differentiation of xylem cells in Arabidopsis cell suspension cultures [12].  
465 Genes were considered to be VND dependent if they were significantly differentially  
466 expressed in WT upon ABA treatment but not in *vnd1 vnd2 vnd3* (*vnd1,2,3*) or *vnd7*  
467 mutants. **(B)** Zoomed in fluorescent micrographs showing autofluorescence of  
468 lignified cells in the cotyledons subjected to auxin/cytokinin/ABA treatment. **(C)**  
469 Ectopic lignification in WT cotyledons treated with auxin/cytokinin/ABA visualized  
470 using Basic Fuchsin staining. **(D-F)** Quantification of total number of lignified xylem  
471 vessels at specified distances from the root tip in *B. rapa* (D), *N. benthamiana* (E)  
472 and *S. lycopersicum* (*Tiny Tim*) (F) after mock and 1  $\mu$ M ABA treatment accompanied  
473 by representative images showing an increase in xylem number. **(G)** qRT-PCR of  
474 VND homologs in tomato roots after 1  $\mu$ M ABA treatment for 6h. Scale bars are 1mm  
475 in B and C. Statistics: \* in E represent  $P < 0.05$ , Fisher's Exact test; \* in H represent  
476  $P < 0.05$ , two tailed Student's t-test. Numbers at the bottom of the bars in D-F  
477 represent the number of roots analyzed.

478

479 **Table S1. RNA sequencing analysis of Col-0, *vnd1 vnd2 vnd3* and *vnd7***  
480 **mutants under mock or ABA treatment.**

481

482 **Table S2. List of primer sequences used in this study**

483

484

485 **STAR methods**

486 **Plant material and growth conditions**

487 Plant material used was *Arabidopsis thaliana*, *Nicotiana benthamiana*,  
488 *Phtheirospermum japonicum* and *Solanum lycopersicum* (cv. Money maker and Tiny  
489 Tim). Seeds were surface sterilized using 70% Ethanol for 20 mins and 95% Ethanol  
490 for 2-3 mins, and then rinsed in water four times. The seeds were imbibed and  
491 stratified for 48h at 4°C, and plated on 0.5xMS medium with 1% Bactoagar. For all  
492 experiments, plants were grown vertically on 25µm pore Sefar Nitex 03-25/19 mesh,  
493 and transferred to new plates by transferring the mesh with the plants on for minimal  
494 disturbance. For experiments involving transfer from ABA back to mock conditions,  
495 seedlings were instead transferred individually to prevent effects of residual ABA on  
496 the mesh. For ABA (Sigma) treatment, stock solutions of 50mM and 5mM ABA in  
497 95% ethanol were used to make plates with ABA concentrations as indicated.  
498 Treatment with polyethylene glycol, was done with PEG 8000, as previously  
499 described [1,32].

500

501 All plant growth was carried out in long day conditions, 16h light (22°C) and 8h  
502 darkness (20°C) at light intensity of 110µE/m<sup>2</sup>/s. For *Arabidopsis* phenotyping  
503 experiments, two-day old seedlings were transferred to 1µM ABA containing plates  
504 for treatments of times indicated. For gene expression analysis, 4-5-day old  
505 seedlings were used. For phenotyping other species, seedlings were grown until  
506 roots reached approximately 1cm in length before transfer to ABA-containing plates.

507

508 All mutants or lines used in this study were in Col-0 background. Mutants and  
509 transgenic lines used in this study include *abi1-1C* [24], *pSCR:abi1-1* [10],  
510 *UAS::abi1-1* [10], *vnd* mutants (*vnd1*, *vnd2*, *vnd3*, *vnd1 vnd2*, *vnd2 vnd3*, *vnd1 vnd3*,  
511 *vnd1 vnd2 vnd3*, *vnd6*, *vnd7*) [25]. For generation of the *vnd1 vnd2 vnd3 vnd7*  
512 quadruple mutant, the *vnd1 vnd2 vnd3* triple mutant was crossed to *vnd7* mutant,  
513 and segregating F2 seedlings were genotyped using the primers listed in Table S1.  
514 The ABA responsive reporters used in this study are from [9] and the VND



515 transcriptional reporters are from [12]. For tissue specific expression of *abi1-1*,  
516 *UAS::abi1-1* were crossed to Haseloff driver lines [26] and the resulting F1 seedlings  
517 were used for further analysis.

518

## 519 **Phenotypic analysis**

### 520 **Xylem morphology quantification**

521 For analysis of xylem morphological changes, roots were mounted directly in  
522 chloralhydrate solution and visualized as described previously [2]. For quantification  
523 of phenotypes, the entire primary root or part of the root grown during the treatment  
524 times were analyzed for differences from wildtype pattern, separately for the distinct  
525 xylem axis positions (*px*, *omx* and *imx*). Phenotypes were categorized and the  
526 number of plants displaying a certain phenotype was used to calculate the frequency.  
527 Presence of more than one phenotype occurring in the same root was classified into  
528 a separate category.

529

### 530 **Determination of point of xylem differentiation initiation**

531 For determination of the point of xylem differentiation initiation, i.e. where secondary  
532 cell wall and lignification can be detected first relative the root tip, roots were cleared  
533 and stained with ClearSee solution containing calcofluor white and basic fuchsin [27].  
534 Tile scans of roots from the root tip was acquired using Zeiss LSM780 inverted Axio  
535 Observer with supersensitive GaAsP detectors. Distances from the root tip to xylem  
536 vessel with bright fuchsin staining (lignin) at different positions in the xylem axis was  
537 measured by drawing a line from the root tip to the point of lignification using Zeiss  
538 Zen software.

539

### 540 **Xylem differentiation at the *inner metaxylem* position**

541 For early *imx* differentiation phenotypes, roots were mounted in chloralhydrate  
542 solution parallel to each other with root tips aligned on glass slides. A line was draw  
543 on the glass slide at a distance of 7mm from the root tip and this 7mm section of the  
544 root from the root tip was analyzed for the presence of lignified metaxylem. Roots  
545 were scored for presence or absence of a lignified *imx* using Zeiss Axioscope A1  
546 microscope. For *B. napus*, *B. rapa* and *S. lycopersicum*, roots were mounted similarly  
547 to Arabidopsis and the number of xylem vessels at 5mm from the root tip was

548 quantified. For *P. japonicum* and *N. benthamiana*, xylem vessel number was  
549 quantified at 2mm from the root tip.

550

551 The number of primary roots analyzed in each experiment is represented in the  
552 individual figures. Most experiments were repeated at least three times with similar  
553 results.

554

### 555 **Confocal analysis**

556 Roots were mounted in 40 $\mu$ M propidium iodide (PI) solution between two cover slips  
557 and imaged immediately. Confocal micrographs were captured using Zeiss LSM780  
558 inverted Axio Observer with supersensitive GaAsP detectors. For calcofluor white  
559 405nm laser was used for excitation and emission wavelengths 410-524nm were  
560 captured in the detector. For basic fuchsin, 561nm excitation; 571-695nm emission.  
561 For reporter lines expressing GFP and stained with PI: 561nm excitation and 650-  
562 719, emission for PI and 488nm excitation and 500-553nm emission for GFP. For  
563 reporter lines expressing YFP, 514nm excitation for both YFP and PI, 518-562  
564 emission for YFP and 651-688nm emission for PI was used. For experiments  
565 involving quantification of fluorescence intensity all imaging parameters were kept the  
566 same when imaging mock and ABA-treated roots. The Zeiss Zen software was used  
567 to quantify YFP intensity. Region of Interests (ROI) encompassing nuclei in the  
568 Arabidopsis root meristem were used to measure average fluorescence intensity.  
569 Nuclei from similar regions in the root was used for mock and ABA treated samples.

570

### 571 **Xylem trans-differentiation of cotyledon cells**

572 For vascular induction in Arabidopsis cotyledons we followed the protocol used for  
573 xylem induction in cotyledons using bikinin with minor modifications [21]. The  
574 modifications include the following: 1. In the induction medium, all components were  
575 like in [21] except that bikinin was replaced with 10 $\mu$ M ABA. 2. The time for induction  
576 was increased from 4 days to 6 days. At the end of the 6-day induction period,  
577 cotyledons were fixed and cleared before visualization of autofluorescence upon UV  
578 exposure. The area of ectopic lignification (autofluorescence) was calculated using  
579 Image J and normalized to the total cotyledon area. Cotyledon veins were excluded  
580 from the quantification.

581

## 582 **Expression analysis by quantitative RT-PCR**

583 qRT-PCR analysis was performed as previously described [2]. For Arabidopsis,  
584 either 1mm root tips or whole roots were used. For *S. lycopersicum* (cv Tiny Tim),  
585 whole roots were collected after 1 $\mu$ M ABA treated for 6h. Primers used in this study  
586 are listed in Table S2. Three biological replicates were used for all samples and  
587 individual data points are represented in graphs. APT1 and GAPDH for Arabidopsis  
588 and ACTIN and TIP41 for tomato was used as reference genes, respectively.

589

## 590 **RNAseq analysis**

591 Five day old Arabidopsis seedlings of Col-0, *vnd1 vnd2 vnd3* and *vnd7* were treated  
592 for 8h with 1 $\mu$ M ABA or mock, respectively. The lower part of the root (1 cm) was  
593 collected, RNA was extracted with Qiagen RNeasy Plant Mini Kit, and sequenced by  
594 Novogene on their Illumina sequencing platform with paired-end read length of 150  
595 and 250-300bp cDNA library. Mapping and differential expression analysis were  
596 done as follows. Briefly, mapping to the reference genome was done using Hisat2,  
597 count files generated using HTSeq and differential expression analysis was done  
598 using DESeq2. Comparison of mock and ABA-treated samples of the respective  
599 genotype and comparing WT mock samples with the *vnd1 vnd2 vnd3* mock and *vnd7*  
600 mock samples were used to identify differentially regulated genes. Genes with an  
601 adjusted p-value < 0.05 were considered differentially expressed. Genes were  
602 annotated as VND dependent if they were differentially expressed in Col-0 upon ABA  
603 treatment but not in the *vnd* mutants. Genes were annotated as VND independent if  
604 they were differentially expressed both in Col-0 and in the *vnd* mutants upon ABA  
605 treatment.

606

## 607 **Statistical analysis**

608 For categorical data, Fisher's exact test was used and p-values less than 0.05 were  
609 considered significant. For other data, One-way Anova or Student's t-test was used.  
610 Statistical tests and significance threshold used are mentioned in the figure legends.

611

612

## 613 **References**

- 614 1. Finkelstein, R. (2013). Abscisic Acid Synthesis and Response. Arabidopsis Book 11,  
615 e0166.
- 616 2. Ramachandran, P., Wang, G., Augstein, F., De Vries, J., and Carlsbecker, A. (2018).  
617 Continuous root xylem formation and vascular acclimation to water deficit involves

- 618 endodermal ABA signalling via miR165. *Dev.* 145.
- 619 3. Bloch, D., Puli, M.R., Mosquna, A., and Yalovsky, S. (2019). Abiotic stress modulates  
620 root patterning via ABA-regulated microRNA expression in the endodermis initials.  
621 *Development* 146, dev177097-29.
- 622 4. Carlsbecker, A., Lee, J.-Y., Roberts, C.J., Dettmer, J., Lehesranta, S., Zhou, J.,  
623 Lindgren, O., Moreno-Risueno, M.A., Vatén, A., Thitamadee, S., *et al.* (2010). Cell  
624 signalling by microRNA165/6 directs gene dose-dependent root cell fate. *Nature* 465,  
625 316–321.
- 626 5. Miyashima, S., Koi, S., Hashimoto, T., and Nakajima, K. (2011). Non-cell-autonomous  
627 microRNA 165 acts in a dose-dependent manner to regulate multiple differentiation  
628 status in the Arabidopsis root. *Development* 138, 2303–2313.
- 629 6. Tang, N., Shahzad, Z., Lonjon, F., Loudet, O., Vailleau, F., and Maurel, C. (2018).  
630 Natural variation at XND1 impacts root hydraulics and trade-off for stress responses in  
631 Arabidopsis. *Nat. Commun.* 9, 3812–3884.
- 632 7. Leung, J., Bouvier-Durand, M., Morris, P.C., Guerrier, D., Cheddor, F., and Giraudat, J.  
633 (1994). Arabidopsis ABA response gene ABI1: features of a calcium-modulated  
634 protein phosphatase. *Science* (80-. ). 264, 1448–1452.
- 635 8. Meyer, K., Leube, M.P., and Grill, E. (1994). A protein phosphatase 2C involved in  
636 ABA signal transduction in Arabidopsis thaliana. *Science* (80-. ). 264, 1452–1455.
- 637 9. Wu, R., Duan, L., Pruneda-Paz, J., Oh, D.-H., Pound, M.P., Kay, S.A., and Dinneny,  
638 J.R. (2018). The 6xABRE synthetic promoter enables the spatiotemporal analysis of  
639 ABA-mediated transcriptional regulation. *Plant Physiol.* 177, pp.00401.2018-1665.
- 640 10. Duan, L., Dietrich, D., Ng, C.H., Chan, P.M.Y., Bhalerao, R., Bennett, M.J., and  
641 Dinneny, J.R. (2013). Endodermal ABA signaling promotes lateral root quiescence  
642 during salt stress in Arabidopsis seedlings. *Plant Cell* 25, 324–341.
- 643 11. Denyer, T., Ma, X., Klesen, S., Scacchi, E., Nieselt, K., and Timmermans, M.C.P.  
644 (2019). Spatiotemporal Developmental Trajectories in the Arabidopsis Root Revealed  
645 Using High-Throughput Single-Cell RNA Sequencing. *Dev. Cell* 48, 840-852.e5.
- 646 12. Kubo, M., Udagawa, M., Nishikubo, N., Horiguchi, G., Yamaguchi, M., Ito, J., Mimura,  
647 T., Fukuda, H., and Demura, T. (2005). Transcription switches for protoxylem and  
648 metaxylem vessel formation. *Genes Dev.* 19, 1855–1860.
- 649 13. Endo, H., Yamaguchi, M., Tamura, T., Nakano, Y., Nishikubo, N., Yoneda, A., Kato,  
650 K., Kubo, M., Kajita, S., Katayama, Y., *et al.* (2015). Multiple classes of transcription  
651 factors regulate the expression of VASCULAR-RELATED NAC-DOMAIN7, a master  
652 switch of xylem vessel differentiation. *Plant Cell Physiol.* 56, 242–254.
- 653 14. Yamaguchi, M., Mitsuda, N., Ohtani, M., Ohme-Takagi, M., Kato, K., and Demura, T.  
654 (2011). VASCULAR-RELATED NAC-DOMAIN 7 directly regulates the expression of a  
655 broad range of genes for xylem vessel formation. *Plant J.* 66, 579–590.
- 656 15. Zhou, J., Zhong, R., and Ye, Z.-H. (2014). Arabidopsis NAC Domain Proteins, VND1  
657 to VND5, Are Transcriptional Regulators of Secondary Wall Biosynthesis in Vessels.  
658 *PLoS One* 9, e105726.
- 659 16. Bloch, D., Puli, M.R., Mosquna, A., and Yalovsky, S. (2019). Abiotic stress modulates  
660 root patterning via ABA-regulated microRNA expression in the endodermis initials.  
661 *Development* 146, dev177097.
- 662 17. Zhong, R., Richardson, E.A., and Ye, Z.H. (2007). The MYB46 transcription factor is a  
663 direct target of SND1 and regulates secondary wall biosynthesis in Arabidopsis. *Plant*  
664 *Cell* 19, 2776–2792.
- 665 18. Sakamoto, S., and Mitsuda, N. (2015). Reconstitution of a secondary cell wall in a  
666 secondary cell wall-deficient arabidopsis mutant. *Plant Cell Physiol.* 56, 299–310.
- 667 19. Taylor-Teeple, M., Lin, L., de Lucas, M., Turco, G., Toal, T.W., Gaudinier, A., Young,  
668 N.F., Trabucco, G.M., Veling, M.T., Lamothe, R., *et al.* (2015). An Arabidopsis gene  
669 regulatory network for secondary cell wall synthesis. *Nature* 517, 571–575.
- 670 20. McCarthy, R.L., Zhong, R., and Ye, Z.H. (2009). MYB83 is a direct target of SND1 and  
671 acts redundantly with MYB46 in the regulation of secondary cell wall biosynthesis in  
672 arabidopsis. *Plant Cell Physiol.* 50, 1950–1964.

- 673 21. Kondo, Y., Fujita, T., Sugiyama, M., and Fukuda, H. (2015). A novel system for xylem  
674 cell differentiation in arabidopsis thaliana. *Mol. Plant* 8, 612–621.
- 675 22. Hwang, B.G., Ryu, J., and Lee, S.J. (2016). Vulnerability of Protoxylem and  
676 Metaxylem Vessels to Embolisms and Radial Refilling in a Vascular Bundle of Maize  
677 Leaves. *Front. Plant Sci.* 7, 941.
- 678 23. Dong, Z., Xu, Z., Xu, L., Galli, M., Gallavotti, A., Dooner, H.K., and Chuck, G. (2020).  
679 Necrotic upper tips1 mimics heat and drought stress and encodes a protoxylem-  
680 specific transcription factor in maize. *Proc. Natl. Acad. Sci. U. S. A.* 117, 20908–  
681 20919.
- 682 24. Kanno, Y., Hanada, A., Chiba, Y., Ichikawa, T., Nakazawa, M., Matsui, M., Koshiba,  
683 T., Kamiya, Y., and Seo, M. (2012). Identification of an abscisic acid transporter by  
684 functional screening using the receptor complex as a sensor. *Proc. Natl. Acad. Sci.*  
685 109, 9653–9658.
- 686 25. Tan, T.T., Endo, H., Sano, R., Kurata, T., Yamaguchi, M., Ohtani, M., and Demura, T.  
687 (2018). Transcription Factors VND1-VND3 Contribute to Cotyledon Xylem Vessel  
688 Formation. *Plant Physiol.* 176, 773–789.
- 689 26. Haseloff, J. (1999). GFP variants for multispectral imaging of living cells. *Methods Cell*  
690 *Biol.* Vol 58 58, 139-+.
- 691 27. Ursache, R., Andersen, T.G., Marhavý, P., and Geldner, N. (2018). A protocol for  
692 combining fluorescent proteins with histological stains for diverse cell wall  
693 components. *Plant J.* 93, 399–412.
- 694

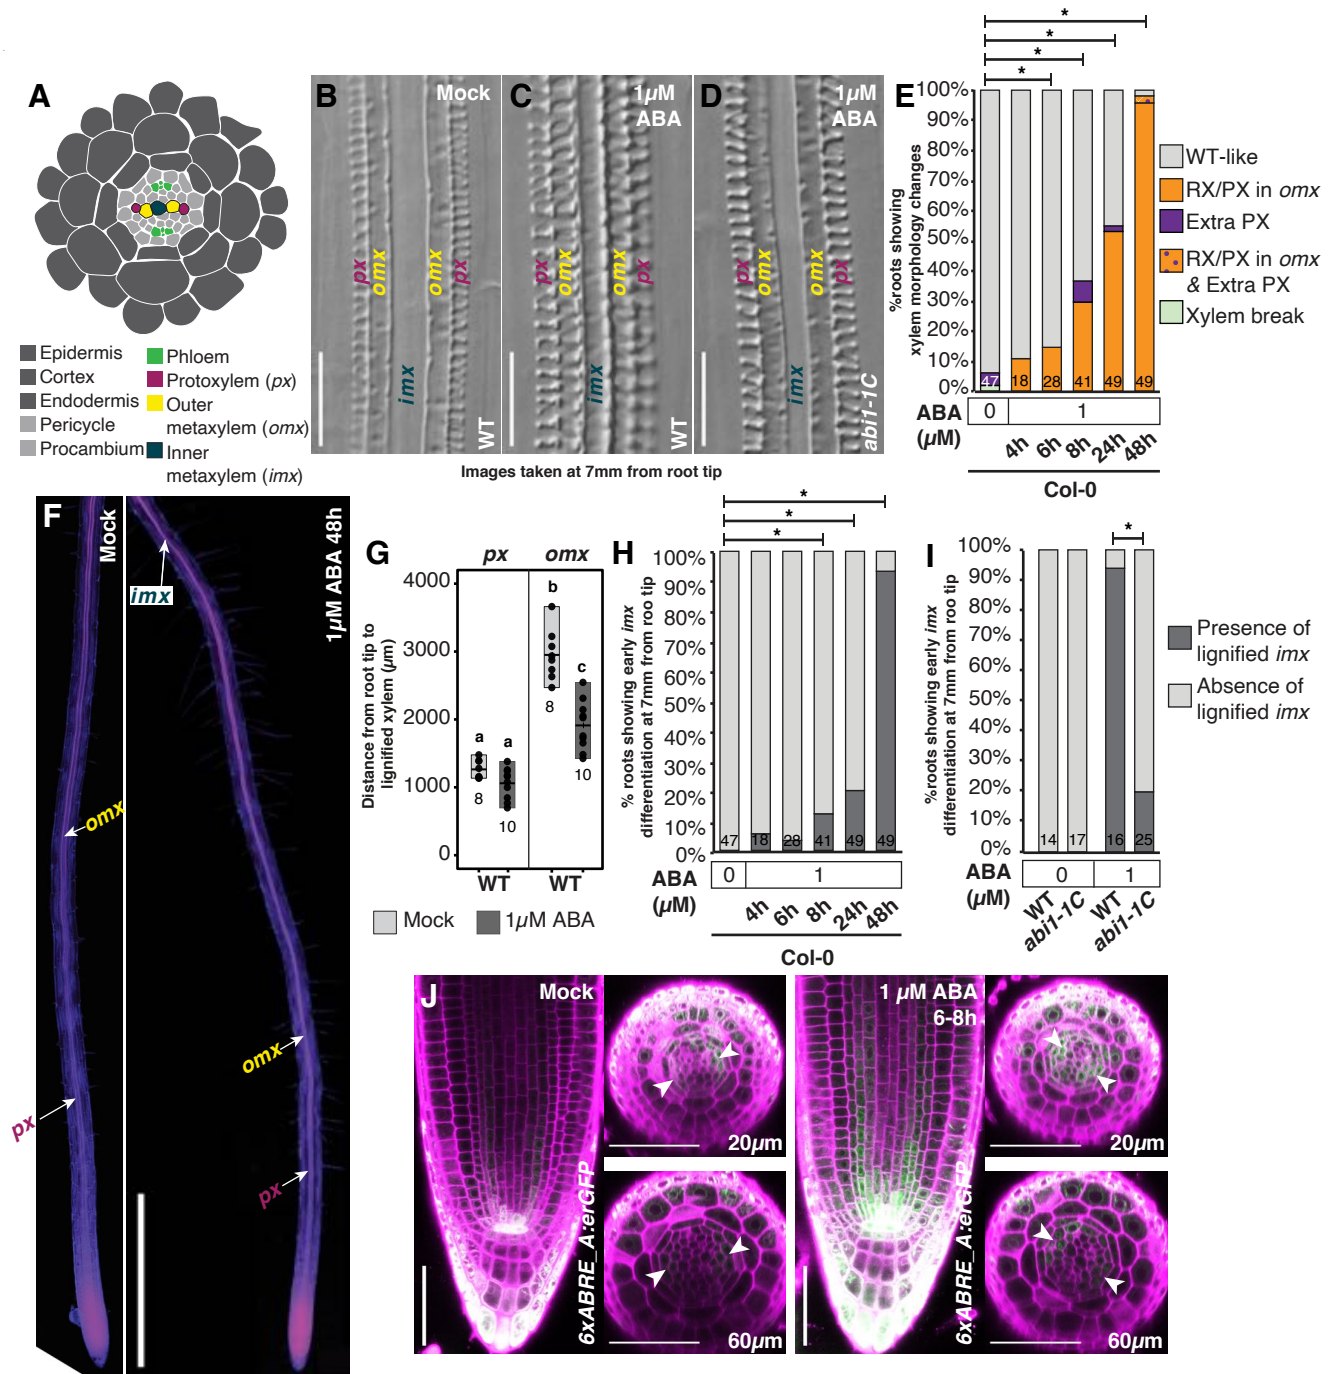

**Figure 1: ABA affects both xylem differentiation fate and rate in Arabidopsis roots**

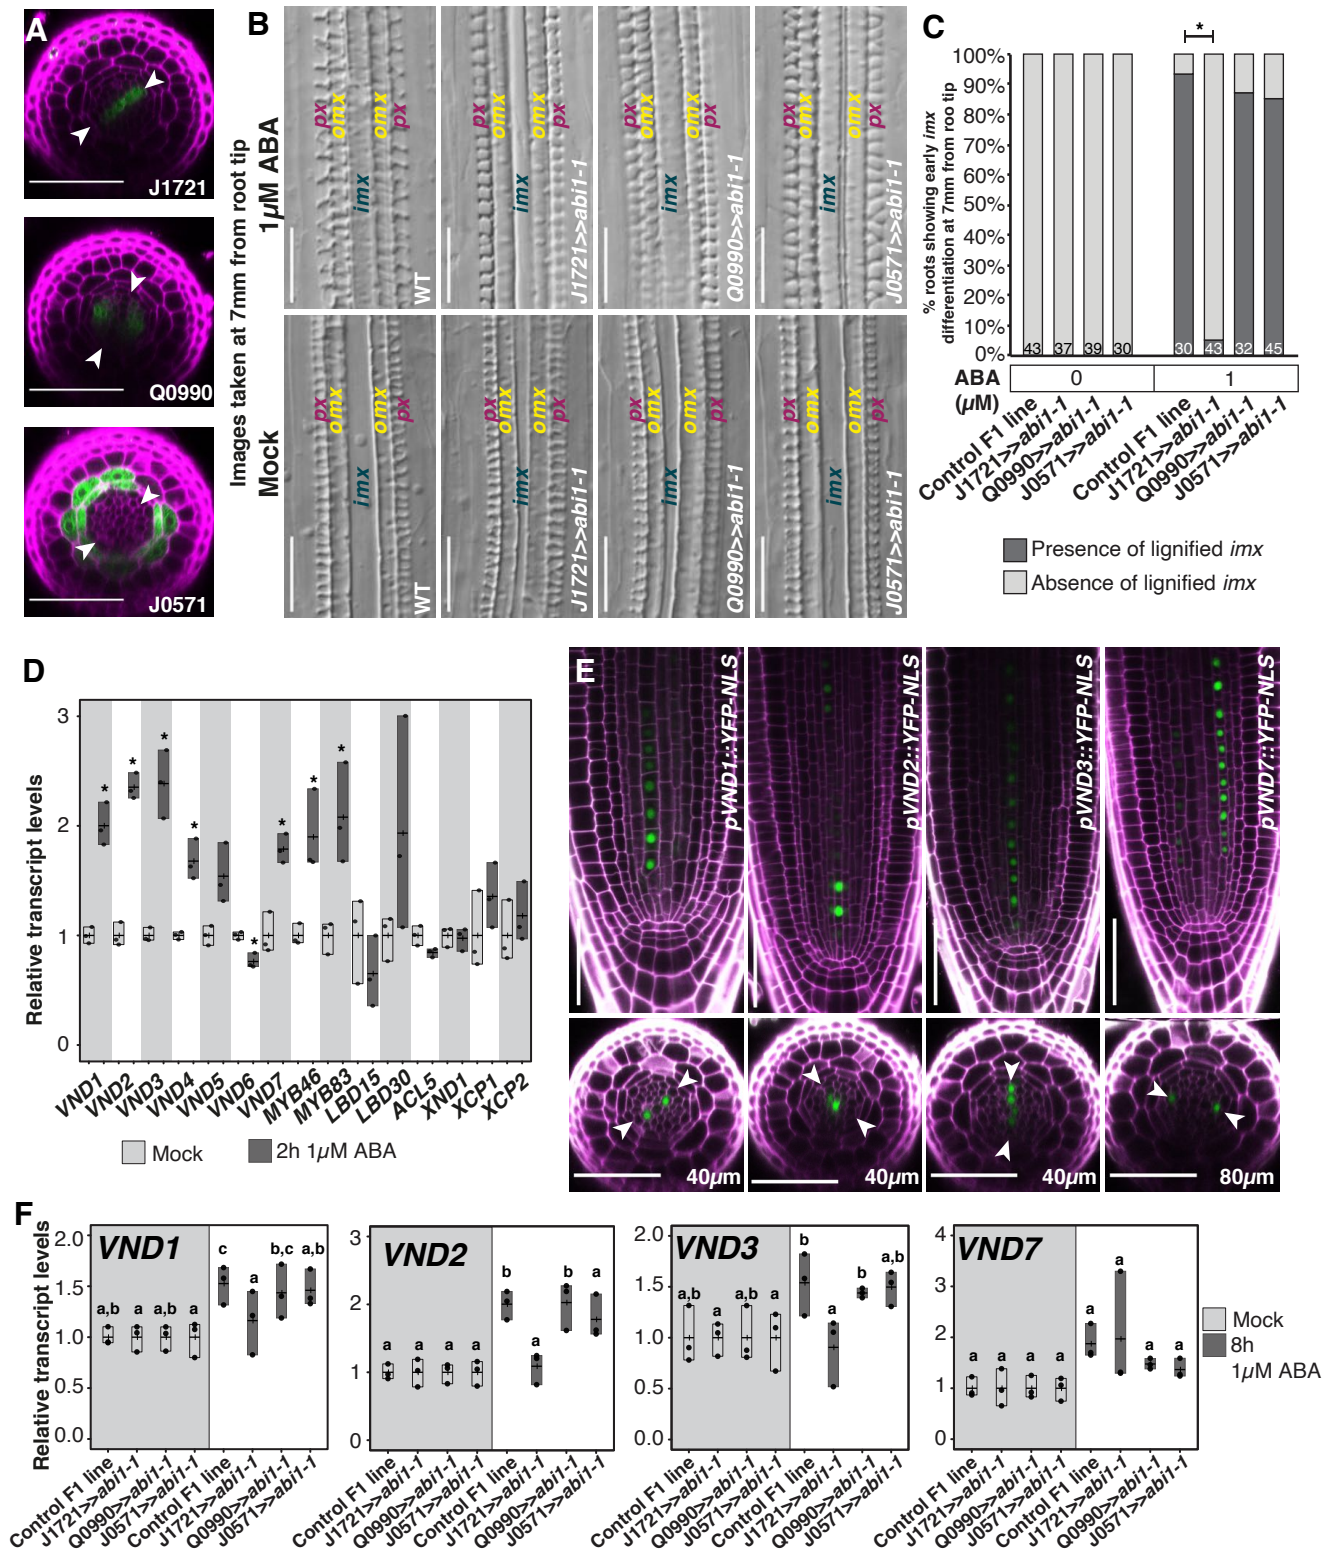

Figure 2: ABA signalling within the xylem activates VND transcription factors

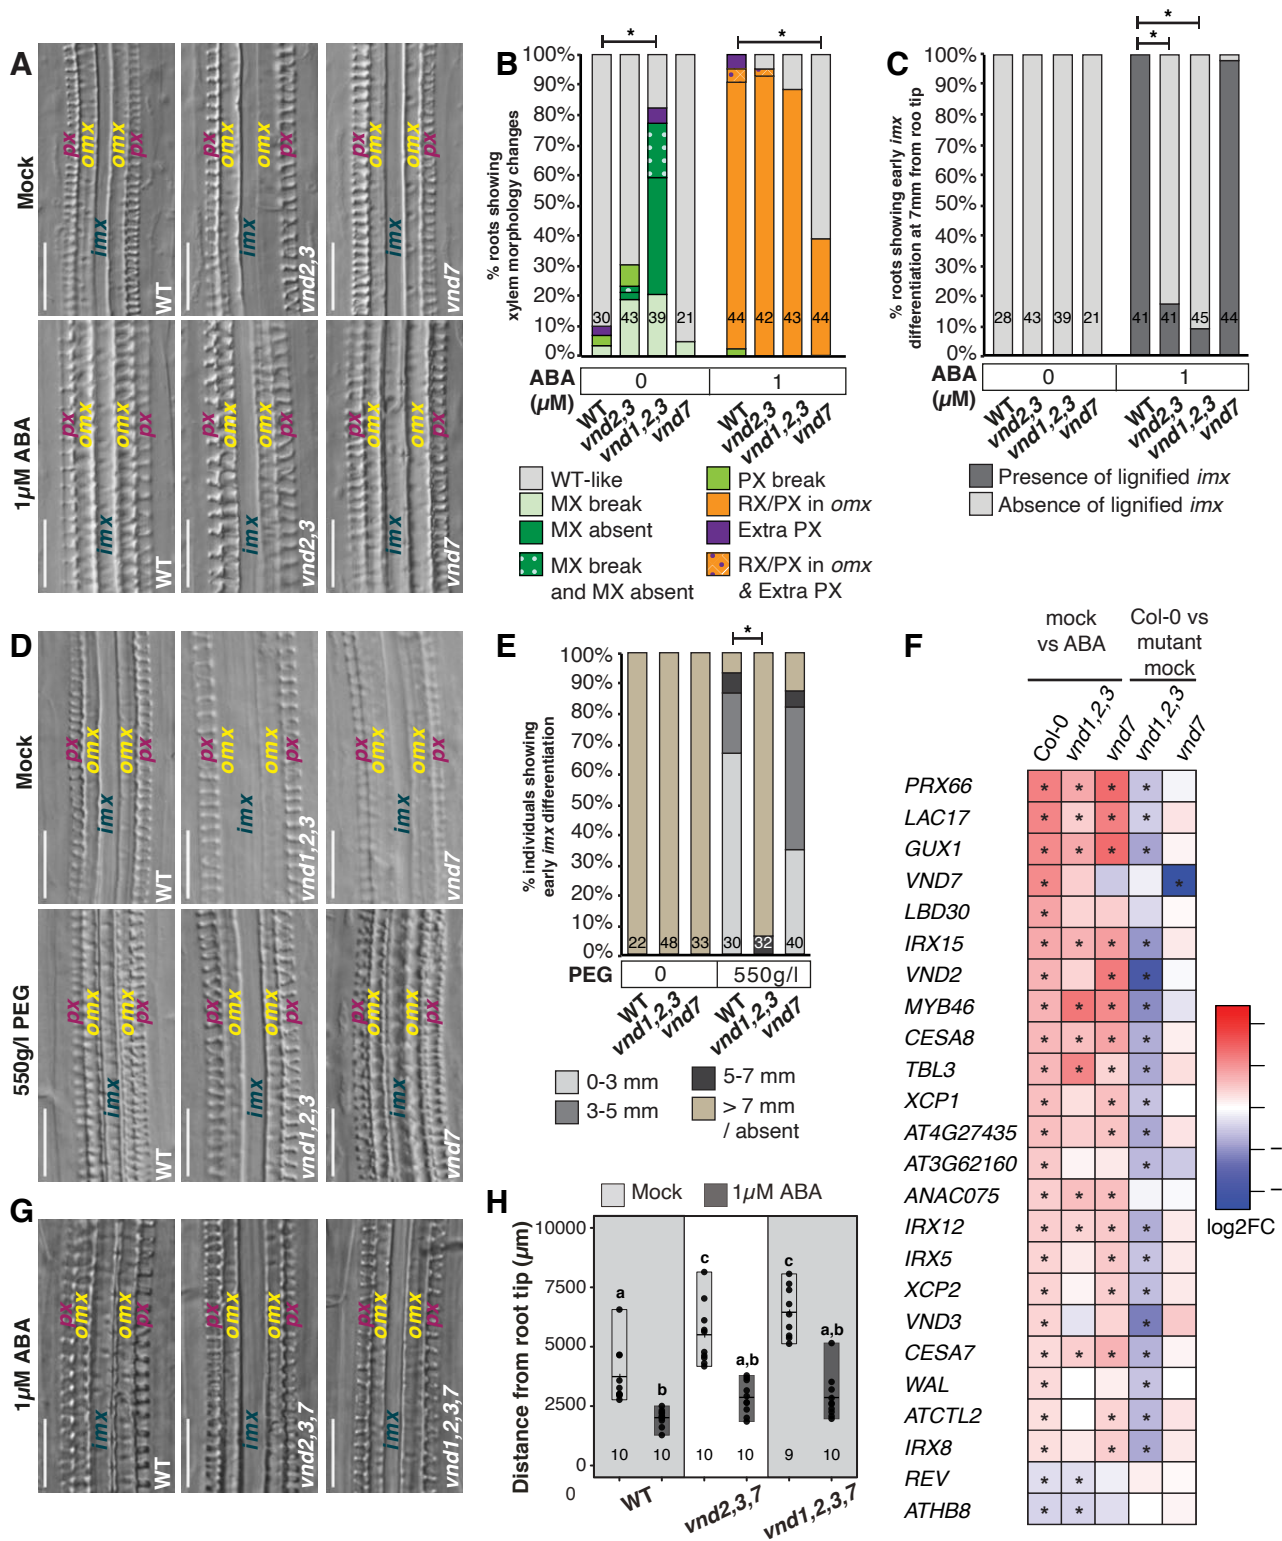

**Figure 3: VNDs regulate plasticity of xylem fate and differentiation rate**



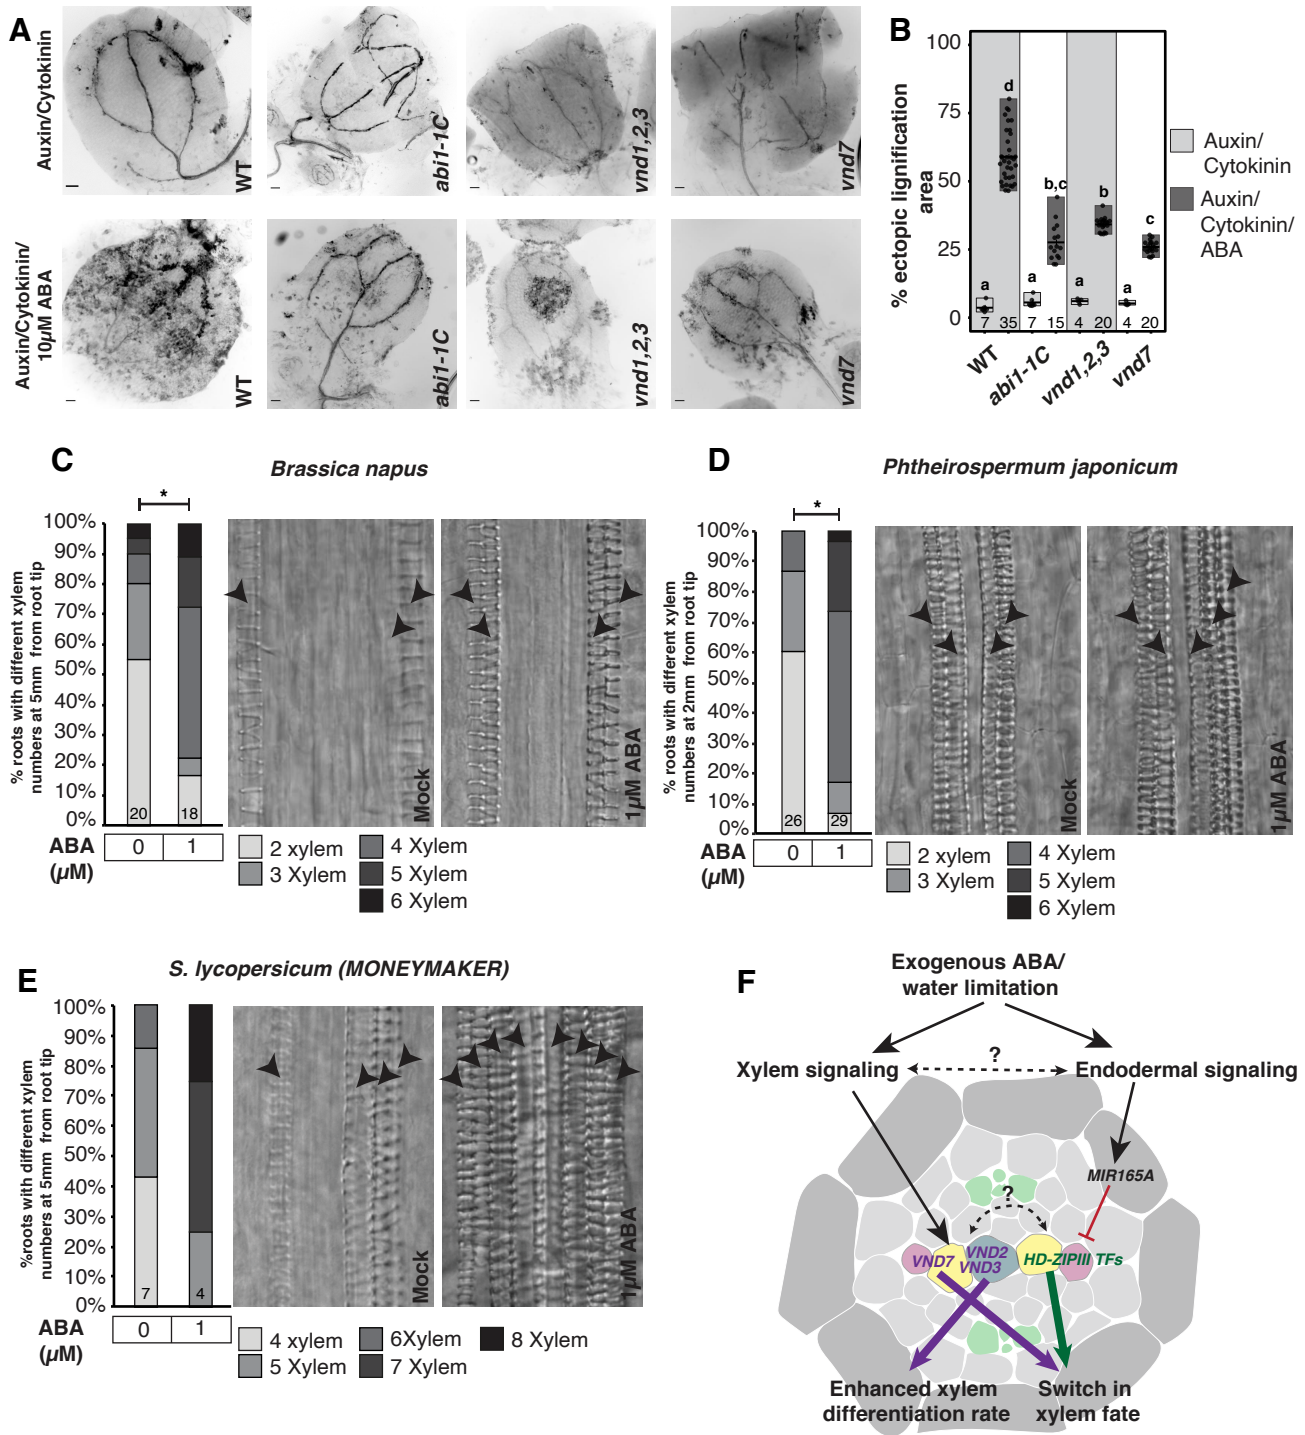

**Figure 4: ABA induces ectopic lignification in *Arabidopsis* cotyledons and promotes xylem differentiation in several eudicot species.**
